# Supplementary material for: In vitro characterization of a novel Isu homologue from Drosophila melanogaster for de novo FeS-cluster formation
Source: Royal Society of Chemistry journal article supplement (doi:10.1039/c6mt00163g), 2016-10-04
Supplement: c6mt00163g1.pdf [file c6mt00163g1.pdf]

# *In vitro* characterization of a novel Isu homologue from *Drosophila melanogaster* for de novo Fe-S cluster formation.

Stephen P. Dzul<sup>‡</sup>, Agostinho G Rocha<sup>#</sup>, Swati Rawat<sup>‡</sup>, Ashoka Kandegadara<sup>‡</sup>, April Kusowski<sup>‡</sup>, Jayashree Pain<sup>‡</sup>, Anjaneyulu Murari<sup>‡</sup>, Debkumar Pain<sup>‡</sup>, Andrew Dancis<sup>#</sup>, Timothy L. Stemmler<sup>‡\*</sup>

<sup>‡</sup>Departments of Pharmaceutical Science and Biochemistry and Molecular Biology, Wayne State University, Detroit, MI 48201; <sup>#</sup>Department of Pharmacology, Physiology, and Neuroscience, New Jersey Medical School, Rutgers University, Newark, New Jersey, 07103; <sup>#</sup>Department of Medicine, Division of Hematology-Oncology, Perelman School of Medicine, University of Pennsylvania, Philadelphia, Pennsylvania 19104

## **Corresponding Author**

\* Timothy L. Stemmler

259 Mack Avenue, EACPHS Room 3138, Detroit, MI 48201

313-577-5712, [timothy.stemmler@wayne.edu](mailto:timothy.stemmler@wayne.edu)

## **Author Contributions**

The manuscript was written through contributions of all authors. All authors have given approval to the final version of the manuscript.

Figure S1: Rate of formation of FeS-fIscU under different Yfh1 concentrations (A). Initial rates of FeS-fIscU formation under differing Yfh1 concentrations (B, black). Gray line represents transition from stimulation to inhibition. Effect of Yfh1 on FeS-fIscU formation is concentration dependent with maximal Yfh1 stimulation occurs 5-10  $\mu\text{M}$  and minimal effect  $\sim 25 \mu\text{M}$ . Reactions all done with 150 mM NaCl, 50  $\mu\text{M}$  fIscU, 10  $\mu\text{M}$  Nfs1-Isd11, and 75  $\mu\text{M}$  Fe.

Figure S2: Complete CD spectrum for FeS clusters formed after 40 minutes during iron concentration study. Spectra presented were formed at 75  $\mu\text{M}$  Fe (green) and 100  $\mu\text{M}$  Fe (black) concentrations, with the addition of 50  $\mu\text{M}$  fIscU monomer and 10  $\mu\text{M}$  Nfs1-Isd11 monomer.

Supplemental Figure 1

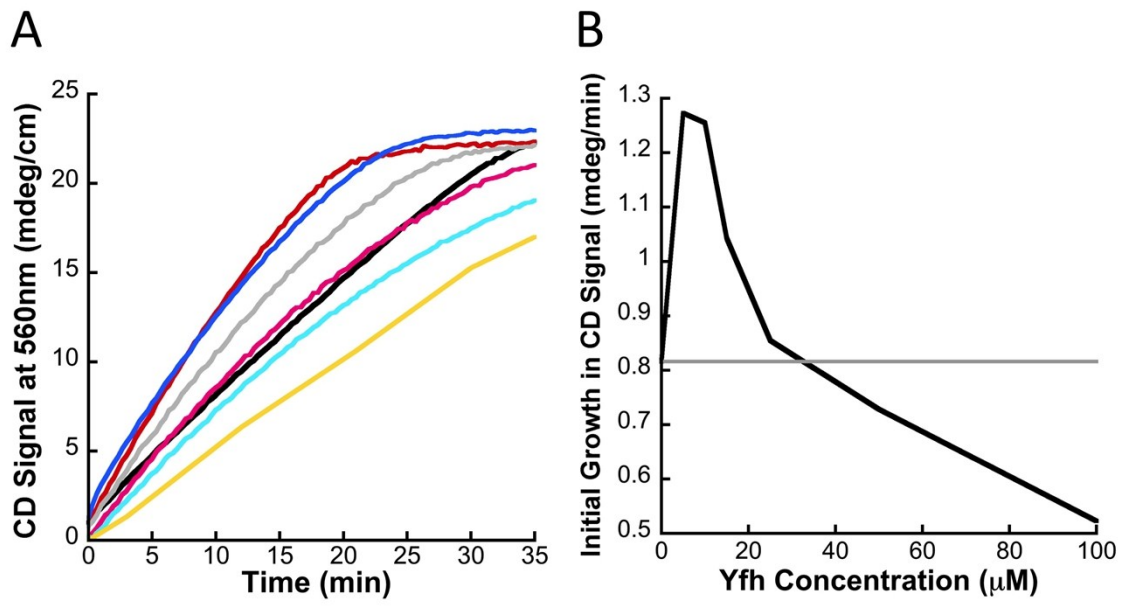

Supplemental Figure 2

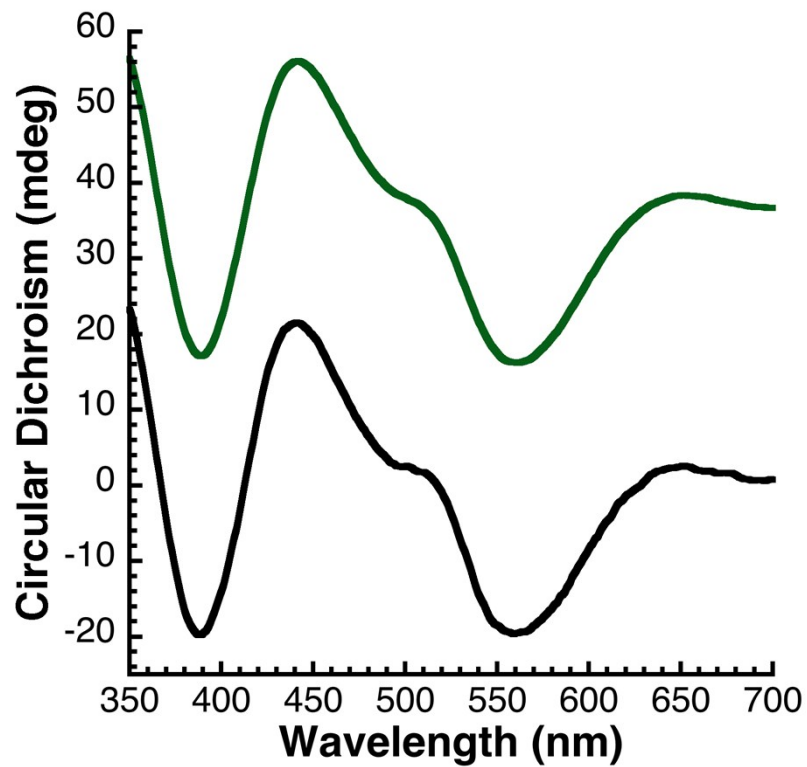

Table S1: Fe K-Edge energies and 1s-3d pre-edge energies for Fe-flscU and FeS-flscU in comparison to Fe(II) and Fe(III) standards.

| <b>Sample</b>                                                  | <b>Fe K-Edge<br/>Energy (eV)</b> | <b>1s-3d area<br/>(eV*100)</b> |
|----------------------------------------------------------------|----------------------------------|--------------------------------|
| <i>aq</i> Fe(II)SO <sub>4</sub>                                | 7123.2                           | 0                              |
| <i>aq</i> Fe(III) <sub>2</sub> (SO <sub>4</sub> ) <sub>3</sub> | 7126.6                           | 3.6                            |
| Fe(II)Cl <sub>2</sub>                                          | 7119.5                           | 2.3                            |
| Fe(III)Cl <sub>3</sub>                                         | 7121.0                           | 14.0                           |
| Fe-flscU                                                       | 7122.7                           | 4.8                            |
| FeS-flscU                                                      | 7120.1                           | 21.7                           |
| FeS-Yah1                                                       | 7119.7                           | 29.1                           |
